# Supplementary material
Source: Springer Nature journal article supplement (https://www.springermedizin.de/resource/supplementary/12936_2013_3122_MOESM1_ESM.pdf/9546210)

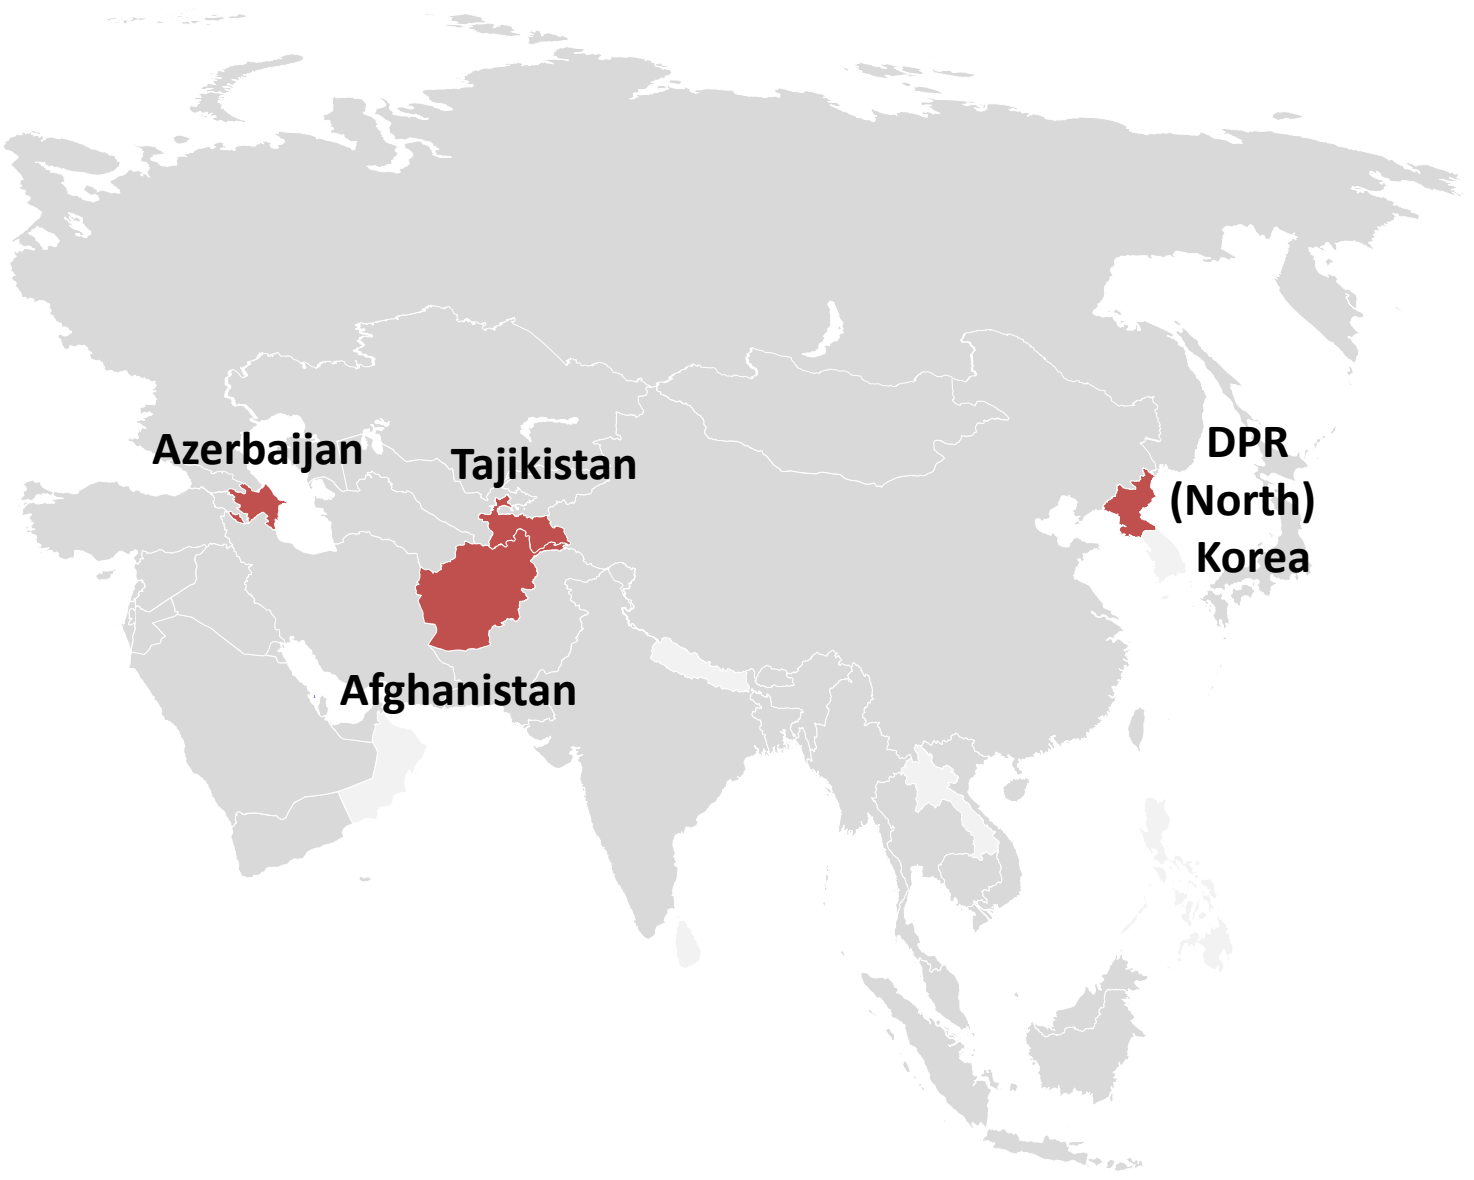

**Azerbaijan**

**Tajikistan**

**DPR  
(North)  
Korea**

**Afghanistan**

Supplement: MOESM1 [file 9546210]
